# Supplementary material for: Risk Factors, Genetic Diversity, and Antimicrobial Resistance of Staphylococcus spp. Isolates in Dogs Admitted to an Intensive Care Unit of a Veterinary Hospital
Source: MDPI journal article supplement (doi:10.3390/antibiotics12030621), 2023-03-21
Supplement: s1 [file s1]

## Supplementar Material

**Supplementary Table S1** – Details of the antimicrobial resistance among staphylococci isolated from dogs admitted to the ICU of HV-UFGM in Belo Horizonte, Minas Gerais, between August 2018 and April 2019.

| Species                    | Isolate<br>s                            | OXA/FO<br>X                | PEN                                    | TET                                    | SXT                                    | ERI                                    | CLI                                    | RIF                                    | CIP                                    | GEN                                    | ENO                                    | CHL                                   | NIT                                  | MRS                                    | MDR                                    |
|----------------------------|-----------------------------------------|----------------------------|----------------------------------------|----------------------------------------|----------------------------------------|----------------------------------------|----------------------------------------|----------------------------------------|----------------------------------------|----------------------------------------|----------------------------------------|---------------------------------------|--------------------------------------|----------------------------------------|----------------------------------------|
| <b>SIG</b>                 | <b>151</b><br><b>(71.5</b><br><b>%)</b> | <b>38</b><br><b>(18%)</b>  | <b>97</b><br><b>(46%)</b>              | <b>88</b><br><b>(41.7</b><br><b>%)</b> | <b>75</b><br><b>(35.5</b><br><b>%)</b> | <b>52</b><br><b>(24.6</b><br><b>%)</b> | <b>52</b><br><b>(24.6</b><br><b>%)</b> | <b>44</b><br><b>(20.8</b><br><b>%)</b> | <b>42</b><br><b>(19.9</b><br><b>%)</b> | <b>42</b><br><b>(19.9</b><br><b>%)</b> | <b>41</b><br><b>(19.4</b><br><b>%)</b> | <b>13</b><br><b>(6.2%</b><br><b>)</b> | <b>1</b><br><b>(0.5%</b><br><b>)</b> | <b>38</b><br><b>(18.0</b><br><b>%)</b> | <b>69</b><br><b>(32.7</b><br><b>%)</b> |
| <i>S. pseudintermedius</i> | 150<br>(71.1%)                          | 38<br>(18.0%)              | 96<br>(45.5%)                          | 87<br>(41.2%)                          | 75<br>(35.5%)                          | 52<br>(24.6%)                          | 52<br>(24.6%)                          | 44<br>(20.8%)                          | 42<br>(19.9%)                          | 42<br>(19.9%)                          | 41<br>(19.4%)                          | 13<br>(6.2%)                          | 1<br>(0.5%)                          | 38<br>(18.0%)                          | 69<br>(32.7%)                          |
| <i>S. delphini</i>         | 1<br>(0.5%)                             | 0<br>(0.0%)                | 1<br>(0.5%)                            | 1<br>(0.5%)                            | 0<br>(0.0%)                            | 0<br>(0.0%)                           | 0<br>(0.0%)                          | 0<br>(0.0%)                            | 0<br>(0.0%)                            |
| <b>Non-SIG</b>             | <b>60</b><br><b>(28.4</b><br><b>%)</b>  | <b>14</b><br><b>(6.6%)</b> | <b>25</b><br><b>(11.8</b><br><b>%)</b> | <b>22</b><br><b>(10.4</b><br><b>%)</b> | <b>19</b><br><b>(9.0%)</b>             | <b>24</b><br><b>(11.4</b><br><b>%)</b> | <b>22</b><br><b>(10.4</b><br><b>%)</b> | <b>6</b><br><b>(2.8%)</b>              | <b>15</b><br><b>(7.1%)</b>             | <b>10</b><br><b>(4.7%)</b>             | <b>15</b><br><b>(7.1%)</b>             | <b>3</b><br><b>(1.4%</b><br><b>)</b>  | <b>3</b><br><b>(1.4%</b><br><b>)</b> | <b>19</b><br><b>(9.0%)</b>             | <b>23</b><br><b>(10.9</b><br><b>%)</b> |
| <i>S. aureus</i>           | 27<br>(12.8%)                           | 4<br>(1.9%)                | 11<br>(5.2%)                           | 10<br>(4.7%)                           | 7<br>(3.3%)                            | 9<br>(4.3%)                            | 8<br>(3.8%)                            | 3<br>(1.4%)                            | 6<br>(2.8%)                            | 5<br>(2.4%)                            | 6<br>(2.8%)                            | 2<br>(0.9%)                           | 2<br>(0.9%)                          | 4<br>(1.9%)                            | 8<br>(3.8%)                            |
| <i>S. haemolyticus</i>     | 13<br>(6.2%)                            | 2<br>(0.9%)                | 6<br>(2.8%)                            | 5<br>(2.4%)                            | 2<br>(0.9%)                            | 6<br>(2.8%)                            | 3<br>(1.4%)                            | 1<br>(0.5%)                            | 2<br>(0.9%)                            | 1<br>(0.5%)                            | 2<br>(0.9%)                            | 0<br>(0.0%)                           | 0<br>(0.0%)                          | 7<br>(3.3%)                            | 3<br>(1.4%)                            |
| <i>S. devriese</i>         | 4<br>(1.9%)                             | 0<br>(0.0%)                | 2<br>(0.9%)                            | 0<br>(0.0%)                            | 0<br>(0.0%)                            | 2<br>(0.9%)                            | 2<br>(0.9%)                            | 0<br>(0.0%)                            | 0<br>(0.0%)                            | 0<br>(0.0%)                            | 0<br>(0.0%)                            | 0<br>(0.0%)                           | 0<br>(0.0%)                          | 1<br>(0.5%)                            | 2<br>(0.9%)                            |
| <i>S. felis</i>            | 3<br>(1.4%)                             | 3<br>(1.4%)                | 2<br>(0.9%)                            | 2<br>(0.9%)                            | 2<br>(0.9%)                            | 2<br>(0.9%)                            | 2<br>(0.9%)                            | 1<br>(0.5%)                            | 2<br>(0.9%)                            | 2<br>(0.9%)                            | 2<br>(0.9%)                            | 0<br>(0.0%)                           | 0<br>(0.0%)                          | 2<br>(0.9%)                            | 3<br>(1.4%)                            |
| <i>S. epidermidis</i>      | 3<br>(1.4%)                             | 2<br>(0.9%)                | 0<br>(0.0%)                            | 2<br>(0.9%)                            | 3<br>(1.4%)                            | 0<br>(0.0%)                            | 0<br>(0.0%)                            | 0<br>(0.0%)                            | 2<br>(0.9%)                            | 0<br>(0.0%)                            | 2<br>(0.9%)                            | 0<br>(0.0%)                           | 0<br>(0.0%)                          | 1<br>(0.5%)                            | 2<br>(0.9%)                            |
| <i>S. hominis</i>          | 3<br>(1.4%)                             | 1<br>(0.5%)                | 2<br>(0.9%)                            | 1<br>(0.5%)                            | 2<br>(0.9%)                            | 3<br>(1.4%)                            | 2<br>(0.9%)                            | 1<br>(0.5%)                            | 1<br>(0.5%)                            | 1<br>(0.5%)                            | 1<br>(0.5%)                            | 1<br>(0.5%)                           | 1<br>(0.5%)                          | 2<br>(0.9%)                            | 2<br>(0.9%)                            |
| <i>S. simulans</i>         | 3                                       | 1                          | 1                                      | 1                                      | 1                                      | 1                                      | 3                                      | 0                                      | 1                                      | 0                                      | 1                                      | 0                                     | 0                                    | 1                                      | 2                                      |

Supplementar Material

|                         |               |                            |                             |                              |                             |                            |                            |                            |                            |                            |                            |                           |                          |               |               |
|-------------------------|---------------|----------------------------|-----------------------------|------------------------------|-----------------------------|----------------------------|----------------------------|----------------------------|----------------------------|----------------------------|----------------------------|---------------------------|--------------------------|---------------|---------------|
|                         | (1.4%)        | (0.5%)                     | (0.5%)                      | (0.5%)                       | (0.5%)                      | (0.5%)                     | (1.4%)                     | (0.0%)                     | (0.5%)                     | (0.0%)                     | (0.5%)                     | (0.0%)                    | (0.0%)                   | (0.5%)        | (0.9%)        |
| <i>S. saprophyticus</i> | 2<br>(1.0%)   | 1<br>(0.5%)                | 1<br>(0.5%)                 | 1<br>(0.5%)                  | 1<br>(0.5%)                 | 1<br>(0.5%)                | 1<br>(0.5%)                | 0<br>(0%)                  | 1<br>(0.5%)                | 1<br>(0.5%)                | 1<br>(0.5%)                | 0<br>(0%)                 | 0<br>(0%)                | 1<br>(0.5%)   | 1<br>(0.5%)   |
| <i>S. schleiferi</i> *  | 1<br>(0.5%)   | 0<br>(0.0%)                | 0<br>(0.0%)                 | 0<br>(0.0%)                  | 1<br>(0.5%)                 | 0<br>(0.0%)                | 0<br>(0.0%)                | 0<br>(0.0%)                | 0<br>(0.0%)                | 0<br>(0.0%)                | 0<br>(0.0%)                | 0<br>(0.0%)               | 0<br>(0.0%)              | 0<br>(0.0%)   | 0<br>(0.0%)   |
| <i>S. equorum</i>       | 1<br>(0.5%)   | 0<br>(0.0%)                | 0<br>(0.0%)                 | 0<br>(0.0%)                  | 0<br>(0.0%)                 | 0<br>(0.0%)                | 1<br>(0.5%)                | 0<br>(0.0%)                | 0<br>(0.0%)                | 0<br>(0.0%)                | 0<br>(0.0%)                | 0<br>(0.0%)               | 0<br>(0.0%)              | 0<br>(0.0%)   | 0<br>(0.0%)   |
| Total                   | 211<br>(100%) | 52 <sup>c</sup><br>(24.6%) | 122 <sup>f</sup><br>(57.8%) | 110 <sup>ef</sup><br>(52.1%) | 94 <sup>de</sup><br>(44.5%) | 76 <sup>d</sup><br>(36.0%) | 74 <sup>d</sup><br>(35.0%) | 50 <sup>c</sup><br>(23.7%) | 57 <sup>c</sup><br>(27.0%) | 52 <sup>c</sup><br>(24.6%) | 56 <sup>c</sup><br>(26.5%) | 16 <sup>b</sup><br>(7.6%) | 4 <sup>a</sup><br>(1.9%) | 57<br>(27.0%) | 92<br>(43.6%) |

## Supplementar Material

**Supplementar Table S2** - Antimicrobial resistance among *Staphylococcus aureus*, *S. pseudintermedius* and other staphylococci isolated from dogs admitted to the ICU of HV-UFGM in Belo Horizonte, Minas Gerais, between August 2018 and April 2019.

| Species                                        | Isolate<br>s          | OXA/FO<br>X                       | PEN                                | TET                                 | SXT                                | ERY                             | CLI                             | RIF                               | CIP                             | GEN                               | ENO                               | CHL                              | NIT                             | MRS                 | MDR                   |
|------------------------------------------------|-----------------------|-----------------------------------|------------------------------------|-------------------------------------|------------------------------------|---------------------------------|---------------------------------|-----------------------------------|---------------------------------|-----------------------------------|-----------------------------------|----------------------------------|---------------------------------|---------------------|-----------------------|
| <i>S. pseudintermedius</i>                     | 150<br>(100%)         | 38<br>(25.3%)                     | 96<br>(64%)                        | 87<br>(58%)                         | 75<br>(50%)                        | 52<br>(34.7%)                   | 52<br>(34.7%)                   | 44<br>(29.3%)                     | 42<br>(28%)                     | 42<br>(28%)                       | 41<br>(27.3%)                     | 13<br>(8.7%)                     | 1<br>(0.7%)                     | 38<br>(25.3%)       | 69<br>(46%)           |
| <i>S. aureus</i>                               | 27<br>(100%)          | 4<br>(14.8%)                      | 11<br>(40.7%)                      | 10<br>(37%)                         | 7<br>(25.9%)                       | 9<br>(33.3%)                    | 8<br>(29.6%)                    | 3<br>(11.1%)                      | 6<br>(22.2%)                    | 5<br>(18.5%)                      | 6<br>(22.2%)                      | 2<br>(7.4%)                      | 2<br>(7.4%)                     | 4<br>(14.8%)        | 8<br>(29.6%)          |
| Other<br>staphylococci<br>species <sup>1</sup> | 34<br>(100%)          | 10<br>(29.4%)                     | 15<br>(44.1%)                      | 13<br>(38.2%)                       | 12<br>(35.3%)                      | 15<br>(44.1%)                   | 14<br>(41.2%)                   | 3<br>(8.8%)                       | 9<br>(26.5%)                    | 5<br>(14.7%)                      | 9<br>(26.5%)                      | 1<br>(2.9%)                      | 1<br>(2.9%)                     | 5<br>(14.7%)        | 15<br>(44.1%)         |
| <b>Total</b>                                   | <b>211<br/>(100%)</b> | <b>52<sup>c</sup><br/>(24.6%)</b> | <b>122<sup>f</sup><br/>(57.8%)</b> | <b>110<sup>ef</sup><br/>(52.1%)</b> | <b>94<sup>de</sup><br/>(44.5%)</b> | <b>76<sup>d</sup><br/>(36%)</b> | <b>74<sup>d</sup><br/>(35%)</b> | <b>50<sup>c</sup><br/>(23.7%)</b> | <b>57<sup>c</sup><br/>(27%)</b> | <b>52<sup>c</sup><br/>(24.6%)</b> | <b>56<sup>c</sup><br/>(26.5%)</b> | <b>16<sup>b</sup><br/>(7.6%)</b> | <b>4<sup>a</sup><br/>(1.9%)</b> | <b>57<br/>(27%)</b> | <b>92<br/>(43.6%)</b> |

**Supplementary Table S3** - Total isolates, frequency, and staphylococcal species that had the *mecA* gene.

| Species                    | Frequency among <i>mecA</i> <sup>+</sup><br>isolates | <i>mecA</i> <sup>+</sup> but CEF/OXA<br>susceptibility |
|----------------------------|------------------------------------------------------|--------------------------------------------------------|
| <i>S. pseudintermedius</i> | 38/48 (79.2%)                                        | 0/38 (0.0%)                                            |
| <i>S. haemolyticus</i>     | 7/48 (14.6%)                                         | 5/7 (71.4%)                                            |
| <i>S. hominis</i>          | 1/48 (2.1%)                                          | 1/1 (100.0%)                                           |
| <i>S. epidermidis</i>      | 1/48 (2.1%)                                          | 1/1 (100.0%)                                           |
| <i>S. devriesei</i>        | 1/48 (2.1%)                                          | 1/1 (100.0%)                                           |
| <b>Total</b>               | <b>48/48 (100.0%)</b>                                | <b>8/48 (16.7%)</b>                                    |

**Supplementary Table S4** - Staphylococcal species and total isolates that showed phenotypic methicillin resistance profile (MRS).

## Supplementar Material

| Species                 | Frequency (%)        |
|-------------------------|----------------------|
| <i>S. aureus</i>        | 4/9 (44.4%)          |
| <i>S. felis</i>         | 2/9 (14.6%)          |
| <i>S. hominis</i>       | 1/9 (11.1%)          |
| <i>S. simulans</i>      | 1/9 (11.1%)          |
| <i>S. saprophyticus</i> | 1/9 (11.1%)          |
| <b>Total</b>            | <b>9/48 (100.0%)</b> |

**Supplementary Table S5** – Breakpoints used to determine the breakpoints for oxacillin and cefotaxime for Staphylococcal species.

| <i>Staphylococcus</i> species                       | Antimicrobial Zone Diameter Breakpoints |                      |
|-----------------------------------------------------|-----------------------------------------|----------------------|
|                                                     | Oxacillin                               | Cefoxitin            |
| <i>S. pseudintermedius</i> and <i>S. schleiferi</i> | R: ≤17 mm /S: ≥18 mm                    | NA                   |
| <i>S. aureus</i> and <i>S. lugdunensis</i>          | NA                                      | R: ≤21 mm /S: ≥22 mm |
| Other <i>Staphylococcus</i> species                 | NA                                      | R: ≤24 mm /S: ≥25 mm |

## Supplementar Material

**Supplementary Table S6:** Isolates and accession number of methicillin-resistant *Staphylococcus pseudintermedius* (MRSP) isolated from nostril, axilla, and rectum from dogs admitted to the Intensive Care Unit of the Veterinary Hospital of the Federal University of Minas Gerais and from dogs diagnosed with MRSP infection in the same institution.

| Isolate | Source<br>(Body site)  | Genome Accession | Reference            |
|---------|------------------------|------------------|----------------------|
| S5.1R   | Colonization (Rectum)  | SAMN32679007     | This study           |
| S32.4N  | Colonization (Nostril) | SAMN32678995     |                      |
| S32.1R  | Colonization (Rectum)  | SAMN32678987     |                      |
| S53.9N  | Colonization (Nostril) | SAMN32679010     |                      |
| S10.1R  | Colonization (Rectum)  | SAMN32679008     |                      |
| S16.4A  | Colonization (Axilla)  | SAMN32678988     |                      |
| S54.4A  | Colonization (Axilla)  | SAMN32679004     |                      |
| S54.3N  | Colonization (Nostril) | SAMN32678993     |                      |
| S53.6R  | Colonization (Rectum)  | SAMN32678992     |                      |
| S57.4R  | Colonization (Rectum)  | SAMN32679001     |                      |
| S17.6R  | Colonization (Rectum)  | SAMN32679009     |                      |
| S53.3N  | Colonization (Nostril) | SAMN32679002     |                      |
| BR49    | Infection              | SAMN32679003     | Vieira et al. (2022) |
| BR52    |                        | SAMN32678998     |                      |
| BR65    |                        | SAMN32678989     |                      |
| BR19    |                        | SAMN32679005     |                      |
| BR89    |                        | SAMN32678991     |                      |
| BR106   |                        | SAMN32678999     |                      |
| BR81    |                        | SAMN32678990     |                      |
| BR67    |                        | SAMN32678994     |                      |
| BR130   |                        | SAMN32678997     |                      |
| AC41    |                        | SAMN32678996     |                      |
